# Supplementary material for: Effects of Sodium Alginate, Pectin and Chitosan Addition on the Physicochemical Properties, Acrylamide Formation and Hydroxymethylfurfural Generation of Air Fried Biscuits
Source: MDPI journal article supplement (doi:10.3390/polym14193961), 2022-09-22
Supplement: s1 [file s1]

Table S1 Correlation analysis of sodium alginate concentration, acrylamide content, pH value, DPPH radical scavenging activity, reducing power and CIE color value of biscuits.

|                                        | Sodium<br>alginate<br>concentration | Acrylamide<br>content | pH      | DPPH<br>radical scavenging<br>activity | Reducing<br>power | CIE L*   | CIE a*  | CIE b*  | BI |
|----------------------------------------|-------------------------------------|-----------------------|---------|----------------------------------------|-------------------|----------|---------|---------|----|
| Sodium alginate<br>concentration       | 1                                   |                       |         |                                        |                   |          |         |         |    |
| Acrylamide content                     | -0.478**                            | 1                     |         |                                        |                   |          |         |         |    |
| pH                                     | 0.532**                             | -0.467*               | 1       |                                        |                   |          |         |         |    |
| DPPH<br>radical scavenging<br>activity | 0.189                               | 0.102                 | -0.394* | 1                                      |                   |          |         |         |    |
| Reducing power                         | 0.776**                             | -0.106                | 0.379*  | 0.105                                  | 1                 |          |         |         |    |
| CIE L*                                 | 0.210                               | -0.221                | 0.112   | 0.090                                  | 0.217             | 1        |         |         |    |
| CIE a*                                 | -0.083                              | 0.275                 | -0.128  | 0.012                                  | 0.101             | -0.550** | 1       |         |    |
| CIE b*                                 | 0.072                               | 0.108                 | 0.022   | 0.082                                  | 0.208             | 0.495**  | 0.356*  | 1       |    |
| BI                                     | -0.162                              | 0.320                 | -0.126  | 0.005                                  | -0.034            | -0.555** | 0.937** | 0.436** | 1  |

\* and \*\* indicate significance at  $p < 0.05$  and  $p < 0.01$  respectively.

BI: browning index.

Table S2 Correlation analysis of pectin concentration, acrylamide content, pH value, DPPH radical scavenging activity, reducing power and CIE color value of biscuits.

|                                        | Pectin<br>concentration | Acrylamide<br>content | pH      | DPPH<br>radical scavenging<br>activity | Reducing<br>power | CIE L*   | CIE a*  | CIE b*  | BI |
|----------------------------------------|-------------------------|-----------------------|---------|----------------------------------------|-------------------|----------|---------|---------|----|
| Pectin concentration                   | 1                       |                       |         |                                        |                   |          |         |         |    |
| Acrylamide content                     | -0.276                  | 1                     |         |                                        |                   |          |         |         |    |
| pH                                     | -0.654**                | 0.276                 | 1       |                                        |                   |          |         |         |    |
| DPPH<br>radical scavenging<br>activity | 0.129                   | -0.436*               | -0.300  | 1                                      |                   |          |         |         |    |
| Reducing power                         | 0.644**                 | -0.559**              | -0.393* | 0.357*                                 | 1                 |          |         |         |    |
| CIE L*                                 | -0.064                  | 0.245                 | -0.146  | 0.094                                  | 0.024             | 1        |         |         |    |
| CIE a*                                 | -0.076                  | 0.250                 | 0.297   | -0.032                                 | -0.146            | -0.283   | 1       |         |    |
| CIE b*                                 | -0.182                  | 0.264                 | 0.315   | -0.001                                 | -0.189            | -0.403*  | 0.574** | 1       |    |
| BI                                     | -0.073                  | -0.018                | 0.389*  | -0.039                                 | -0.150            | -0.500** | 0.751** | 0.576** | 1  |

\* and \*\* indicate significance at  $p < 0.05$  and  $p < 0.01$  respectively.

BI: browning index.

Table S3 Correlation analysis of chitosan concentration, acrylamide content, pH value, DPPH radical scavenging activity, reducing power and CIE color value of biscuits.

|                                        | Chitosan<br>concentration | Acrylamide | pH       | DPPH<br>radical scavenging<br>activity | Reducing<br>power | CIE L*  | CIE a*  | CIE b* | BI |
|----------------------------------------|---------------------------|------------|----------|----------------------------------------|-------------------|---------|---------|--------|----|
| Chitosan<br>concentration              | 1                         |            |          |                                        |                   |         |         |        |    |
| Acrylamide                             | -0.512**                  | 1          |          |                                        |                   |         |         |        |    |
| pH                                     | 0.217                     | 0.405*     | 1        |                                        |                   |         |         |        |    |
| DPPH<br>radical scavenging<br>activity | -0.167                    | -0.110     | -0.348*  | 1                                      |                   |         |         |        |    |
| Reducing power                         | 0.491**                   | -0.666**   | -0.486** | 0.010                                  | 1                 |         |         |        |    |
| CIE L*                                 | 0.066                     | -0.144     | -0.080   | -0.005                                 | 0.313             | 1       |         |        |    |
| CIE a*                                 | 0.199                     | 0.021      | 0.085    | 0.192                                  | 0.131             | -0.295  | 1       |        |    |
| CIE b*                                 | 0.088                     | -0.280     | -0.198   | 0.204                                  | 0.349*            | 0.813** | 0.136   | 1      |    |
| BI                                     | 0.050                     | -0.166     | -0.145   | 0.329*                                 | 0.041             | -0.401* | 0.798** | 0.200  | 1  |

\* and \*\* indicate significance at  $p < 0.05$  and  $p < 0.01$  respectively.

BI: browning index.
